# Supplementary material
Source: PubMed Central journal article supplement (PMC8482837)
Supplement: NIHMS1685839-supplement-1.pdf [file NIHMS1685839-supplement-1.pdf]

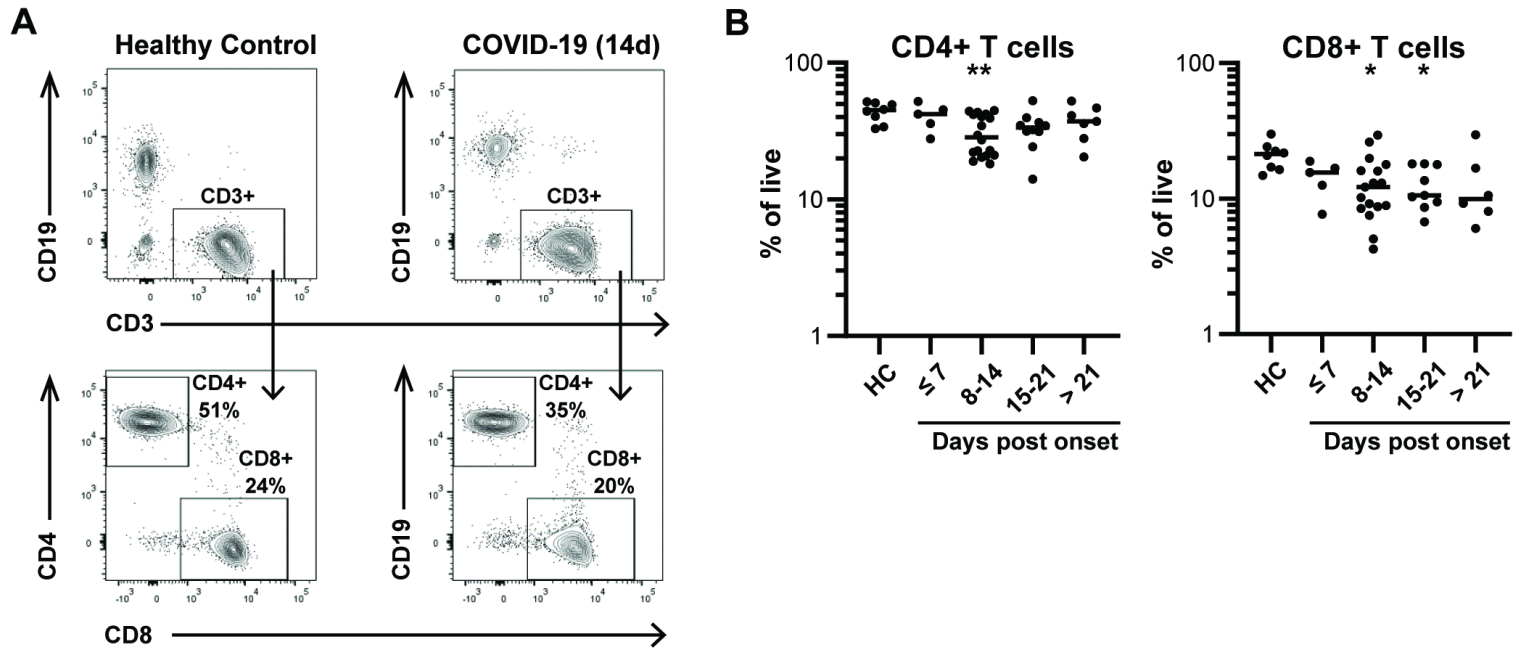

**Supplemental Figure 1.** CD4+ and CD8+ T cells decreased in COVID-19 patients. A) CD3+ T cells gated by expression of CD4 and CD8 in a healthy control (left) vs. a COVID-19 patient 14 DpSO. B) Percentage of CD4+ (left) or CD8+ (right) cells are shown for healthy controls (n=8) or hospitalized COVID-19 patients (n=47) over time, measured as days post symptom onset. Six patients contributed more than one timepoint. Significance is calculated by Brown-Forsythe ANOVA test or Holm-Sidak multiple T test. \*p<0.05, \*\*p<0.01

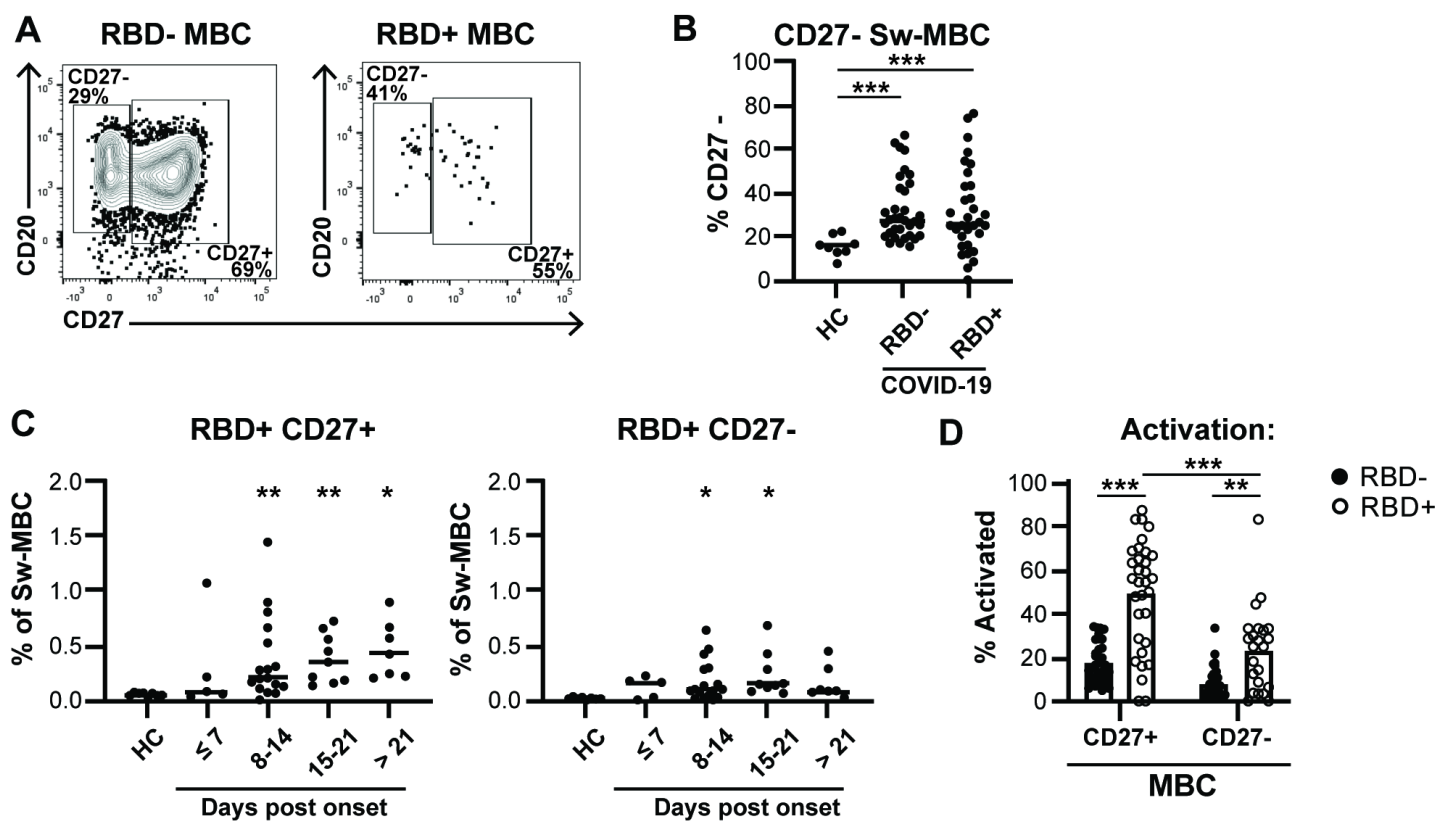

**Supplemental Figure 2.** RBD-specific MBCs are found in both the CD27+ and CD27- subsets. A) RBD-binding (right) and non-binding (left) MBCs are gated by expression of CD27. B) The percent of CD27-negative healthy control (n=8), non-RBD-specific (n=33) and RBD-specific (n=30) MBCs. C) RBD-specific CD27+ (left) or CD27- (right) MBCs are shown as the percent of total switched-MBC for healthy controls (n=8) and COVID-19 patients (n=34) over time. D) Activation of RBD-specific and non-specific MBCs in COVID-19 patients, divided by CD27 expression. Significance is calculated by Brown-Forsythe ANOVA test. \*p<0.05, \*\*p<0.01, \*\*\*p<0.001

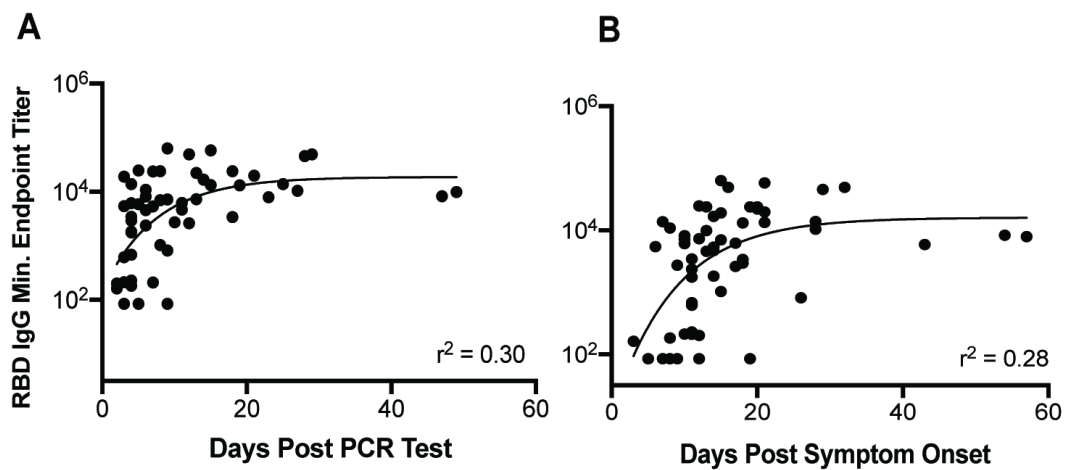

**Supplemental Figure 3.** RBD-specific IgG titers correlate with time from infection. Days post infection as measured by either (A) positive PCR test or (B) self-reported days post-symptom onset plotted against circulating RBD-specific IgG. R2 values are calculated from an exponential plateau best-fit model in Prism.

Supplementary Table 1. Clinical & Serological Data Summary

| PTID            | Sex | Age | Disease Severity | Days From Positive PCR Test | Days From Symptom Onset | Total Days in Hospital | Fatal | RBD  |       |       | Full Spike |        |      | Nucleoprotein |        |        | FRNT50 |
|-----------------|-----|-----|------------------|-----------------------------|-------------------------|------------------------|-------|------|-------|-------|------------|--------|------|---------------|--------|--------|--------|
|                 |     |     |                  |                             |                         |                        |       | IgM  | IgG   | IgA   | IgM        | IgG    | IgA  | IgM           | IgG    | IgA    |        |
| 1 <sup>a</sup>  | M   | 73  | Severe           | 15                          | 21                      | 44                     | N     | 171  | 13339 | 10211 | 281        | 8144   | 5422 | 575           | 48913  | 8208   | 1152   |
| 2 <sup>a</sup>  | M   | 60  | Severe           | 6                           | 10                      | 34                     | N     | 2590 | 8192  | 85    | 4309       | 7899   | 85   | 225           | 26461  | 85     | 1547   |
|                 |     |     |                  | 12                          | 16                      |                        |       | 6874 | 49384 | 85    | 38115      | 87297  | 85   | 1132          | 121091 | 106    | n.d.   |
| 3 <sup>a</sup>  | F   | 60  | Severe           | 8                           | 15                      | 11                     | Y     | 132  | 6985  | 639   | 227        | 11173  | 527  | 146           | 16734  | 413    | 163    |
|                 |     |     |                  | 6                           | 13                      |                        |       | 169  | 4574  | 2495  | 1111       | 4728   | 4360 | 85            | 951    | 2417   | 663    |
| 4 <sup>a</sup>  | M   | 48  | Severe           | 47                          | 54                      | 48                     | N     | 85   | 8295  | 696   | 85         | 3690   | 430  | 85            | 654    | 352    | n.d.   |
|                 |     |     |                  | 8                           | 20                      |                        |       | 1394 | 23884 | 3288  | 6009       | 23141  | 3844 | 545           | 2372   | 174309 | 1214   |
| 5 <sup>a</sup>  | F   | 56  | Severe           | 5                           | 12                      | 20                     | N     | 85   | 85    | 194   | 372        | 21211  | 261  | 434           | 49733  | 1356   | 72     |
|                 |     |     |                  | 8                           | 15                      |                        |       | 147  | 1032  | 1112  | 325        | 21713  | 569  | 783           | 36023  | 6666   | n.d.   |
| 6 <sup>a</sup>  | M   | 73  | Severe           | 4                           | 11                      | 41                     | N     | 85   | 229   | 103   | 522        | 203    | 2268 | 85            | 21505  | 356    | 95     |
|                 |     |     |                  | 7                           | 14                      |                        |       | 232  | 5379  | 957   | 767        | 4308   | 5330 | 85            | 114266 | 715    | n.d.   |
| 7 <sup>a</sup>  | F   | 47  | Moderate         | 3                           | 10                      | 4                      | N     | 85   | 212   | 134   | 230        | 481    | 287  | 85            | 586    | 112    | 317    |
| 8 <sup>a</sup>  | M   | 76  | Severe           | 3                           | 15                      | 6                      | N     | 493  | 19108 | 2958  | 957        | 17623  | 2138 | 85            | 3688   | 7867   | 1378   |
| 9 <sup>a</sup>  | F   | 46  | Moderate         | 5                           | 12                      | 5                      | N     | 230  | 24830 | 9274  | 868        | 12756  | 6036 | 85            | 3647   | 5330   | 729    |
| 10 <sup>a</sup> | F   | 61  | Severe           | 14                          | 14                      | 36                     | N     | 102  | 16815 | 438   | 238        | 12779  | 1354 | 85            | 7920   | 20096  | 401    |
|                 |     |     |                  | 21                          | 21                      |                        |       | 85   | 19784 | 516   | 85         | 8962   | 364  | 85            | 4447   | 7188   | n.d.   |
| 11 <sup>a</sup> | M   | 46  | Severe           | 13                          | 20                      | 5                      | N     | 85   | 22162 | 2642  | 252        | 337093 | 4357 | 287           | 120111 | 597    | 1341   |
| 12 <sup>a</sup> | M   | 69  | Severe           | 19                          | 18                      | 20                     | N     | 415  | 13127 | 458   | 860        | 18168  | 858  | 85            | 157384 | 585    | 2205   |
| 13 <sup>a</sup> | M   | 55  | Severe           | 4                           | 8                       | 12                     | N     | 162  | 183   | 399   | 188        | 196    | 398  | 85            | 85     | 85     | 113    |
|                 |     |     |                  | 25                          | 28                      |                        |       | 151  | 13830 | 484   | 375        | 18608  | 3023 | 170           | 5689   | 9308   | 754    |
| 14 <sup>a</sup> | F   | 54  | Severe           | 2                           | 3                       | 3                      | N     | 134  | 163   | 85    | 80         | 1105   | 103  | 85            | 272    | 125    | 139    |
|                 |     |     |                  | 27                          | 28                      |                        |       | 194  | 10442 | 800   | 549        | 7479   | 291  | 85            | 5012   | 154    | n.d.   |
| 15 <sup>a</sup> | F   | 24  | Moderate         | 3                           | 6                       | 2                      | N     | 1129 | 5437  | 2288  | 1712       | 737    | 1971 | 115           | 215    | 734    | 1020   |
| 16 <sup>a</sup> | M   | 62  | Severe           | 23                          | 57                      | 35                     | N     | 85   | 7942  | 499   | 280        | 6954   | 464  | 85            | 16583  | 534    | 328    |
|                 |     |     |                  | 18                          | 19                      |                        |       | 292  | 23860 | 1539  | 1361       | 19899  | 2935 | 85            | 25239  | 3451   | 1080   |
| 17 <sup>a</sup> | F   | 92  | Severe           | 28                          | 29                      | 33                     | N     | 221  | 45741 | 1448  | 325        | 26000  | 1379 | 104           | 17622  | 574    | n.d.   |
| 18 <sup>a</sup> | F   | 58  | Severe           | 15                          | 21                      | 27                     | Y     | 255  | 58346 | 6803  | 1440       | 32416  | 3752 | 85            | 41945  | 2459   | 1026   |
| 19 <sup>a</sup> | M   | 59  | Severe           | 12                          | 17                      | 8                      | Y     | 1069 | 2612  | 7244  | 2174       | 871    | 5657 | 289           | 41431  | 8292   | 720    |
| 20 <sup>a</sup> | M   | 68  | Severe           | 6                           | 8                       | 8                      | N     | 185  | 10906 | 274   | 308        | 10273  | 159  | 85            | 1989   | 368    | 905    |
| 21 <sup>a</sup> | M   | 78  | Severe           | 5                           | 43                      | 24                     | N     | 85   | 5885  | 151   | 187        | 9767   | 280  | 85            | 12755  | 7586   | 281    |
| 22 <sup>a</sup> | M   | 77  | Severe           | 29                          | 32                      | 40                     | N     | 85   | 49325 | 645   | 85         | 48066  | 428  | 85            | 54024  | 4527   | 435    |
| 23 <sup>a</sup> | M   | 20  | Severe           | 9                           | 26                      | 20                     | N     | 85   | 818   | 357   | 153        | 300    | 392  | 85            | 557    | 146    | 94     |
| 24 <sup>a</sup> | M   | 99  | Severe           | 49                          | 13                      | 30                     | N     | 122  | 9887  | 5177  | 205        | 14989  | 1144 | 85            | 1283   | 365    | 283    |
| 25 <sup>a</sup> | F   | 85  | Moderate         | 5                           | 5                       | 3                      | N     | 85   | 85    | 119   | 85         | 85     | 85   | 85            | 238    | 388    | 15     |
|                 |     |     |                  | 18                          | 18                      |                        |       | 245  | 3398  | 1674  | 235        | 2203   | 1184 | 85            | 142126 | 49883  | n.d.   |
| 26 <sup>a</sup> | M   | 63  | Severe           | 2                           | 12                      | 5                      | N     | 85   | 202   | 140   | 85         | 230    | 85   | 85            | 544    | 413    | 23     |
| 27 <sup>a</sup> | F   | 36  | Severe           | 7                           | 11                      | 4                      | N     | 85   | 210   | 85    | 85         | 153    | 85   | 85            | 1342   | 85     | 82     |
| 28 <sup>a</sup> | M   | 41  | Severe           | 5                           | 7                       | 5                      | N     | 104  | 85    | 136   | 85         | 407    | 85   | 85            | 324    | 85     | 163    |
| 29 <sup>a</sup> | M   | 26  | Severe           | 3                           | 11                      | 5                      | N     | 85   | 617   | 675   | 85         | 349    | 135  | 85            | 321    | 85     | 102    |
| 30 <sup>a</sup> | F   | 56  | Severe           | 6                           | 11                      | 4                      | N     | 281  | 2366  | 1822  | 183        | 1145   | 1311 | 85            | 1562   | 140    | 111    |
| 31 <sup>a</sup> | M   | 34  | Severe           | 10                          | 9                       | 6                      | N     | 293  | 2736  | 2732  | 363        | 1302   | 728  | 85            | 770    | 202    | 403    |
|                 |     |     |                  | 13                          | 12                      |                        |       | 372  | 7292  | 1216  | 676        | 4305   | 1391 | 85            | 5137   | 320    | n.d.   |
| 32 <sup>a</sup> | M   | 62  | Severe           | 4                           | 10                      | 33                     | Y     | 682  | 6126  | 1771  | 438        | 2642   | 218  | 154           | 1025   | 20215  | 503    |
|                 |     |     |                  | 7                           | 13                      |                        |       | 1598 | 23819 | 1248  | 849        | 6533   | 375  | 193           | 4764   | 18438  | n.d.   |
|                 |     |     |                  | 11                          | 17                      |                        |       | 593  | 6229  | 934   | 646        | 5486   | 912  | 105           | 3230   | 49453  | n.d.   |
| 33 <sup>a</sup> | M   | 51  | Severe           | 4                           | 7                       | 5                      | N     | 550  | 13780 | 695   | 813        | 14374  | 164  | 85            | 342    | 340    | 1230   |
| 34 <sup>a</sup> | M   | 48  | Severe           | 4                           | 11                      | 6                      | N     | 85   | 682   | 1500  | 85         | 320    | 279  | 212           | 13527  | 2280   | 89     |
| 35 <sup>a</sup> | F   | 54  | Severe           | 4                           | 11                      | 5                      | N     | 104  | 1761  | 402   | 85         | 719    | 114  | 85            | 405    | 151    | 297    |
| 36 <sup>a</sup> | F   | 49  | Severe           | 4                           | 11                      | 9                      | N     | 917  | 3451  | 4321  | 709        | 883    | 1430 | 158           | 3256   | 4901   | 1134   |
| 37 <sup>a</sup> | F   | 73  | Severe           | 4                           | 18                      | 6                      | N     | 85   | 2950  | 113   | 85         | 3729   | 85   | 85            | 109681 | 5668   | 205    |
| 38 <sup>a</sup> | M   | 58  | Severe           | 9                           | 10                      | 8                      | N     | 368  | 7193  | 863   | 256        | 9237   | 899  | 1537          | 7856   | 3483   | 432    |
| 39 <sup>a</sup> | F   | 50  | Severe           | 9                           | 15                      | N/A                    | N/A   | 2129 | 63143 | 4718  | 707        | 28898  | 3074 | 85            | 41575  | 9134   | 1354   |
| 40 <sup>a</sup> | F   | 83  | Severe           | 3                           | 8                       | 21                     | N     | 85   | 85    | 303   | 85         | 85     | 85   | 85            | 218    | 127    | 15     |
| 41 <sup>a</sup> | M   | 72  | Severe           | 9                           | 9                       | 32                     | Y     | 85   | 85    | 85    | 85         | 85     | 85   | 85            | 227    | 85     | 15     |
| 42 <sup>a</sup> | F   | 62  | Severe           | 11                          | 14                      | 20                     | N     | 371  | 4691  | 18777 | 85         | 727    | 2588 | 85            | 2243   | 4434   | 954    |
| 43 <sup>a</sup> | F   | 65  | Severe           | 9                           | 19                      | 12                     | N     | 85   | 85    | 85    | 85         | 85     | 144  | 85            | 85     | 85     | 28     |
| 44 <sup>a</sup> | M   | 64  | Severe           | 4                           | 14                      | 17                     | Y     | 184  | 1817  | 864   | 179        | 2197   | 85   | 1022          | 4851   | 3491   | 525    |
| 45 <sup>a</sup> | M   | 65  | Severe           | 31                          | 40                      | 20                     | N     | 342  | 26380 | 1889  | 457        | 17252  | 1269 | 85            | 8305   | 383    | 596    |
| 46 <sup>a</sup> | M   | 55  | Severe           | 31                          | 46                      | 2                      | N     | 955  | 9097  | 600   | 1216       | 4750   | 284  | 276           | 2928   | 1075   | 1007   |
| 47 <sup>a</sup> | F   | 36  | nd               | 8                           | 15                      | nd                     | nd    | 664  | 86698 | 313   | nd         | nd     | nd   | nd            | nd     | nd     | 2233   |
| 48 <sup>a</sup> | M   | 76  | nd               | 7                           | 17                      | nd                     | nd    | 1493 | 28352 | 6865  | nd         | nd     | nd   | nd            | nd     | nd     | 2561   |

<sup>a</sup>Clinical data, RBD binding and neutralization previously published in Suthar, et al (2020)

<sup>b</sup>Individuals were discharged from hospital at time of sampling

<sup>c</sup>Individuals included in serum depletion analysis
